# Supplementary material
Source: PubMed Central journal article supplement (PMC3798000)
Supplement: NIHMS440834-supplement-1.pdf [file NIHMS440834-supplement-1.pdf]

## **SI Guide:**

**SI File 1. "Supplementary\_materials.pdf" Title:** Expanded Discussion; Supplementary Figures and Legends 1-30.

**SI File 1. "Supplementary\_materials.pdf" Summary:** An expanded discussion and 30 supplementary figures with legends that present additional data analysis results referred to in the manuscript with references added in notes (PDF, 5.9 MB).

**SI File 2. "Supplementary\_tables.xls" Title:** Supplementary Tables 1-26.

**SI File 2. "Supplementary\_tables.xls" Summary:** 26 supplementary tables that provide additional information referred to in the manuscript (Microsoft Excel .xls, 19.7 MB).
